# Supplementary material for: Self-Organization of -Crown Ether Derivatives into Double-Columnar Arrays Controlled by Supramolecular Isomers of Hydrogen-Bonded Anionic Biimidazolate Ni Complexes
Source: Hindawi journal article supplement (doi:10.1155/2012/216050), 2012-01-01
Supplement: f1 [file 216050.f1.pdf]

# Supporting information

## Self-organization to Double Columnar Arrays of K<sup>+</sup>-Crown Ether Derivatives into Double-Columnar Arrays Controlled by Supramolecular Isomers of Hydrogen-Bonded Anionic Biimidazolate Ni Complexes

**Makoto Tadokoro,\*<sup>[a]</sup> Kyosuke Isoda,<sup>[a]</sup> Yasuko Tanaka,<sup>[a]</sup> Yuko Kaneko,<sup>[a]</sup> Syoko Yamamoto,<sup>[a]</sup> Tokmoaki Sugaya,<sup>[a]</sup> and Kazuhiro Nakasuji<sup>[b]</sup>**

[a] Department of Chemistry, Faculty of Science, Tokyo University of Science, Kagurazaka 1-3, Shinjuku-ku, Tokyo 162-8601, Fax: +81-3-5261-4631, E-mail: tadokoro@rs.kagu.tus.ac.jp

[b] Fukui Institute of Technology, Gakuen 3-6-1, Fukui 910-8505

Table 1S. Crystal data of 1 ~ 5

Table 2S. Selected bond lengths and angles for Crystals 1~5

Figure 1S. ORTEP view of crystal 1 with the numbering scheme

Figure 2S. ORTEP view of crystal 2 with the numbering scheme

Figure 3S. ORTEP view of crystal 3 with the numbering scheme

Figure 4-1S. ORTEP view of crystal 4 with the numbering scheme

Figure 4-2S. ORTEP view of crystal 4 with the numbering scheme

Figure 5S. ORTEP view of crystal 5 with the numbering scheme

Table 1S.

Crystal data of 1 ~ 5

|                                                                 | 1                                                                   | 2                                                                  | 3                                                                  | 4                                                                                               | 5                                                                   |
|-----------------------------------------------------------------|---------------------------------------------------------------------|--------------------------------------------------------------------|--------------------------------------------------------------------|-------------------------------------------------------------------------------------------------|---------------------------------------------------------------------|
| Formula                                                         | C <sub>41</sub> H <sub>67</sub> N <sub>12</sub> O <sub>11</sub> NiK | C <sub>34</sub> H <sub>51</sub> N <sub>12</sub> O <sub>8</sub> NiK | C <sub>35</sub> H <sub>43</sub> N <sub>12</sub> O <sub>7</sub> NiK | C <sub>74</sub> H <sub>110</sub> N <sub>56</sub> O <sub>14</sub> Ni <sub>2</sub> K <sub>2</sub> | C <sub>38</sub> H <sub>59</sub> N <sub>14</sub> O <sub>16</sub> NiK |
| <i>M</i> <sub>w</sub>                                           | 1001.85                                                             | 853.65                                                             | 841.60                                                             | 1811.46                                                                                         | 937.77                                                              |
| Crystal system                                                  | <i>monoclinic</i>                                                   | <i>monoclinic</i>                                                  | <i>monoclinic</i>                                                  | <i>triclinic</i>                                                                                | <i>monoclinic</i>                                                   |
| Space Group                                                     | <i>C2/m</i> (#14)                                                   | <i>P2<sub>1</sub>/n</i> (#14)                                      | <i>P2<sub>1</sub>/n</i> (#14)                                      | <i>P</i> -1 (#2)                                                                                | <i>C2/c</i> (#15)                                                   |
| <i>T</i> [K]                                                    | 296                                                                 | 296                                                                | 296                                                                | 296                                                                                             | 296                                                                 |
| <i>a</i> [Å]                                                    | 19.077(3)                                                           | 8.7797(11)                                                         | 9.294(2)                                                           | 13.962(1)                                                                                       | 18.966(2)                                                           |
| <i>b</i> [Å]                                                    | 29.074(3)                                                           | 17.039(3)                                                          | 25.183(5)                                                          | 25.636(3)                                                                                       | 19.058(2)                                                           |
| <i>c</i> [Å]                                                    | 9.769(3)                                                            | 28.3270(18)                                                        | 17.099(2)                                                          | 12.937(1)                                                                                       | 25.469(2)                                                           |
| $\alpha$ [°]                                                    |                                                                     |                                                                    |                                                                    | 100.034(8)                                                                                      |                                                                     |
| $\beta$ [°]                                                     | 110.39(2)                                                           | 91.496(1)                                                          | 95.64(1)                                                           | 93.221(8)                                                                                       | 103.201(8)                                                          |
| $\gamma$ [°]                                                    |                                                                     |                                                                    |                                                                    | 101.778(7)                                                                                      |                                                                     |
| <i>V</i> [Å <sup>3</sup> ]                                      | 5078(1)                                                             | 4236.3(9)                                                          | 3982(1)                                                            | 4443.4(7)                                                                                       | 8962.9(14)                                                          |
| <i>Z</i>                                                        | 4                                                                   | 4                                                                  | 4                                                                  | 2                                                                                               | 8                                                                   |
| <i>D</i> <sub>calc</sub> /g cm <sup>-3</sup>                    | 1.310                                                               | 1.338                                                              | 1.403                                                              | 1.354                                                                                           | 1.390                                                               |
| <i>F</i> (000)                                                  | 2128.00                                                             | 1800.00                                                            | 1760.00                                                            | 1912.00                                                                                         | 3968.00                                                             |
| $\mu$ (CuK $\alpha$ ) [cm <sup>-1</sup> ]                       | 18.38                                                               | 20.567                                                             | 21.65                                                              | 19.89                                                                                           | 20.076                                                              |
| Total Reflections                                               | 4004                                                                | 6774                                                               | 5702                                                               | 12450                                                                                           | 6233                                                                |
| Unique reflections                                              | 3797                                                                | 6113                                                               | 4243                                                               | 11840                                                                                           | 5820                                                                |
| No. variables                                                   | 322                                                                 | 562                                                                | 544                                                                | 1165                                                                                            | 587                                                                 |
| Goodness of fit                                                 | 0.996                                                               | 1.113                                                              | 1.829                                                              | 1.513                                                                                           | 1.189                                                               |
| <i>R</i> <sub>1</sub> ( <i>I</i> > 3.00 $\sigma$ ( <i>I</i> ))  | 0.0665                                                              | 0.0751                                                             | 0.0659                                                             | 0.0938                                                                                          | 0.0742                                                              |
| <i>wR</i> <sub>2</sub> ( <i>I</i> > 3.00 $\sigma$ ( <i>I</i> )) | 0.1435                                                              | 0.1736                                                             | 0.1791                                                             | 0.2128                                                                                          | 0.1635                                                              |
| Residual max.<br>(min.) peak [eÅ <sup>-3</sup> ]                | 0.36 (-0.23)                                                        | 0.49 (-0.86)                                                       | 0.22 (-0.22)                                                       | 0.98 (-1.14)                                                                                    | 1.03 (-0.59)                                                        |

Table 2S. Selected bond lengths [Å] and angles [°] for Crystals 1~5

| Crystal 1        |          |                   |          |
|------------------|----------|-------------------|----------|
| Ni(1)-N(1)       | 2.13(1)  | Ni(1)-N(5)        | 2.13(9)  |
| Ni(1)-N(3)       | 1.975(8) |                   | 1        |
|                  |          |                   | 13(9)    |
| N(3)-Ni(1)-N(1)  | 77.8(4)  | Ni(1)-N(3)-C(3)   | 143.2(9) |
| N(5)-Ni(1)-N(1)  | 163.5(3) | Ni(1)-N(3)-C(6)   | 120.0(7) |
| N(5)-Ni(1)-N(3)  | 90.8(3)  | Ni(1)-N(5)-C(7)   | 141.6(7) |
| Ni(1)-N(1)-C(1)  | 139.4(8) | Ni(1)-N(5)-C(9)   | 112.3(7) |
| Ni(1)-N(1)-C(5)  | 111.7(7) |                   |          |
| Crystal 2        |          |                   |          |
| Ni(1)-N(1)       | 2.142(5) | Ni(1)-N(7)        | 2.083(6) |
| Ni(1)-N(3)       | 2.079(5) | Ni(1)-N(9)        | 2.136(6) |
| Ni(1)-N(5)       | 2.091(6) | Ni(1)-N(11)       | 2.078(5) |
| N(3)-Ni(1)-N(1)  | 78.5(2)  | N(11)-Ni(1)-N(9)  | 78.5(2)  |
| N(5)-Ni(1)-N(1)  | 92.8(2)  | Ni(1)-N(1)-C(1)   | 142.8(5) |
| N(7)-Ni(1)-N(1)  | 165.7(2) | Ni(1)-N(1)-C(5)   | 112.0(4) |
| N(9)-Ni(1)-N(1)  | 93.4(2)  | Ni(1)-N(3)-C(3)   | 140.4(5) |
| N(11)-Ni(1)-N(1) | 97.4(2)  | Ni(1)-N(3)-C(6)   | 114.6(4) |
| N(5)-Ni(1)-N(3)  | 99.7(2)  | Ni(1)-N(5)-C(7)   | 143.5(5) |
| N(7)-Ni(1)-N(3)  | 91.4(2)  | Ni(1)-N(5)-C(11)  | 112.9(4) |
| N(9)-Ni(1)-N(3)  | 165.4(2) | Ni(1)-N(7)-C(9)   | 141.0(5) |
| N(11)-Ni(1)-N(3) | 90.4(2)  | Ni(1)-N(7)-C(12)  | 114.1(4) |
| N(7)-Ni(1)-N(5)  | 79.0(2)  | Ni(1)-N(9)-C(13)  | 142.8(5) |
| N(9)-Ni(1)-N(5)  | 92.7(2)  | Ni(1)-N(9)-C(17)  | 111.5(5) |
| N(11)-Ni(1)-N(5) | 166.9(2) | Ni(1)-N(11)-C(15) | 141.0(5) |
| N(9)-Ni(1)-N(7)  | 98.6(2)  | Ni(1)-N(11)-C(18) | 114.6(4) |
| N(11)-Ni(1)-N(7) | 92.6(2)  |                   |          |
| Crystal 3        |          |                   |          |
| Ni(1)-N(1)       | 2.147(4) | Ni(1)-N(7)        | 2.109(4) |
| Ni(1)-N(3)       | 2.078(4) | Ni(1)-N(9)        | 2.112(4) |
| Ni(1)-N(5)       | 2.079(4) | Ni(1)-N(11)       | 2.073(4) |
| N(3)-Ni(1)-N(1)  | 79.0(1)  | N(9)-Ni(1)-N(5)   | 101.0(2) |
| N(5)-Ni(1)-N(1)  | 92.1(1)  | N(11)-Ni(1)-N(5)  | 92.9(2)  |
| N(7)-Ni(1)-N(1)  | 96.5(1)  | Ni(1)-N(5)-C(7)   | 142.3(3) |
| N(9)-Ni(1)-N(1)  | 162.1(1) | Ni(1)-N(5)-C(11)  | 113.8(3) |
| N(11)-Ni(1)-N(1) | 88.1(1)  | N(9)-Ni(1)-N(7)   | 97.8(1)  |
| Ni(1)-N(1)-C(1)  | 141.8(3) | N(11)-Ni(1)-N(7)  | 170.9(2) |
| Ni(1)-N(1)-C(5)  | 110.8(3) | Ni(1)-N(7)-C(9)   | 142.7(3) |
| N(5)-Ni(1)-N(3)  | 167.5(1) | Ni(1)-N(7)-C(12)  | 112.8(3) |
| N(7)-Ni(1)-N(3)  | 93.1(1)  | N(11)-Ni(1)-N(9)  | 79.2(1)  |
| N(9)-Ni(1)-N(3)  | 89.6(1)  | Ni(1)-N(9)-C(13)  | 141.4(3) |
| N(11)-Ni(1)-N(3) | 95.6(1)  | Ni(1)-N(9)-C(17)  | 112.4(3) |
| Ni(1)-N(3)-C(3)  | 141.7(3) | Ni(1)-N(11)-C(15) | 143.2(3) |
| Ni(1)-N(3)-C(6)  | 114.2(3) | Ni(1)-N(11)-C(18) | 112.7(3) |
| N(7)-Ni(1)-N(5)  | 79.1(2)  |                   |          |
| Crystal 4        |          |                   |          |
| Ni(1)-N(1)       | 2.10(1)  | Ni(2)-N(13)       | 2.08(1)  |
| Ni(1)-N(3)       | 2.10(1)  | Ni(2)-N(15)       | 2.122(9) |

| Ni(1)-N(5)        | 2.06(1)  | Ni(2)-N(17)       | 2.11(1)  |
|-------------------|----------|-------------------|----------|
| Ni(1)-N(7)        | 2.13(1)  | Ni(2)-N(19)       | 2.07(1)  |
| Ni(1)-N(9)        | 2.18(1)  | Ni(2)-N(21)       | 2.15(1)  |
| Ni(1)-N(11)       | 2.02(1)  | Ni(2)-N(23)       | 2.08(1)  |
| N(3)-Ni(1)-N(1)   | 78.7(4)  | N(15)-Ni(2)-N(13) | 78.7(4)  |
| N(5)-Ni(1)-N(1)   | 92.0(4)  | N(17)-Ni(2)-N(13) | 89.6(4)  |
| N(7)-Ni(1)-N(1)   | 165.5(4) | N(19)-Ni(2)-N(13) | 96.3(4)  |
| N(9)-Ni(1)-N(1)   | 88.0(4)  | N(21)-Ni(2)-N(13) | 162.4(4) |
| N(11)-Ni(1)-N(1)  | 98.3(4)  | N(23)-Ni(2)-N(13) | 95.0(4)  |
| Ni(1)-N(1)-C(1)   | 141.1(9) | Ni(2)-N(13)-C(19) | 141.2(8) |
| Ni(1)-N(1)-C(5)   | 113.4(9) | Ni(2)-N(13)-C(23) | 114(1)   |
| N(5)-Ni(1)-N(3)   | 97.7(4)  | N(17)-Ni(2)-N(15) | 162.7(4) |
| N(7)-Ni(1)-N(3)   | 91.3(4)  | N(19)-Ni(2)-N(15) | 89.6(4)  |
| N(9)-Ni(1)-N(3)   | 162.1(4) | N(21)-Ni(2)-N(15) | 86.1(4)  |
| N(11)-Ni(1)-N(3)  | 91.1(5)  | N(23)-Ni(2)-N(15) | 99.8(4)  |
| Ni(1)-N(3)-C(3)   | 142.3(8) | Ni(2)-N(15)-C(21) | 144.5(9) |
| Ni(1)-N(3)-C(6)   | 113(1)   | Ni(2)-N(15)-C(24) | 114.0(8) |
| N(7)-Ni(1)-N(5)   | 78.8(5)  | N(19)-Ni(2)-N(17) | 78.8(4)  |
| N(9)-Ni(1)-N(5)   | 94.6(4)  | N(21)-Ni(2)-N(17) | 107.1(4) |
| N(11)-Ni(1)-N(5)  | 167.5(4) | N(23)-Ni(2)-N(17) | 94.0(4)  |
| Ni(1)-N(5)-C(7)   | 144(1)   | Ni(2)-N(17)-C(25) | 140(1)   |
| Ni(1)-N(5)-C(11)  | 113.2(8) | Ni(2)-N(17)-C(29) | 111.3(9) |
| N(9)-Ni(1)-N(7)   | 103.8(4) | N(21)-Ni(2)-N(19) | 92.6(5)  |
| N(11)-Ni(1)-N(7)  | 92.2(4)  | N(23)-Ni(2)-N(19) | 166.5(4) |
| Ni(1)-N(7)-C(9)   | 140(1)   | Ni(2)-N(19)-C(27) | 143.7(9) |
| Ni(1)-N(7)-C(12)  | 110.4(9) | Ni(2)-N(19)-C(30) | 114.2(9) |
| N(11)-Ni(1)-N(9)  | 78.9(4)  | N(23)-Ni(2)-N(21) | 78.6(5)  |
| Ni(1)-N(9)-C(13)  | 138.3(8) | Ni(2)-N(21)-C(31) | 136.5(9) |
| Ni(1)-N(9)-C(17)  | 107.6(9) | Ni(2)-N(21)-C(35) | 109.4(9) |
| Ni(1)-N(11)-C(15) | 144(1)   | Ni(2)-N(23)-C(33) | 144(1)   |
| Ni(1)-N(11)-C(18) | 117(1)   | Ni(2)-N(23)-C(36) | 115.1(9) |
| Crystal 5         |          |                   |          |
| Ni(1)-N(1)        | 2.151(6) | Ni(1)-N(7)        | 2.089(6) |
| Ni(1)-N(3)        | 2.092(6) | Ni(1)-N(9)        | 2.088(6) |
| Ni(1)-N(5)        | 2.140(6) | Ni(1)-N(11)       | 2.139(5) |
| N(3)-Ni(1)-N(1)   | 79.4(2)  | N(9)-Ni(1)-N(5)   | 90.6(2)  |
| N(5)-Ni(1)-N(1)   | 105.9(2) | N(11)-Ni(1)-N(5)  | 165.0(2) |
| N(7)-Ni(1)-N(1)   | 93.5(2)  | Ni(1)-N(5)-C(7)   | 140.3(5) |
| N(9)-Ni(1)-N(1)   | 162.9(2) | Ni(1)-N(5)-C(11)  | 110.5(5) |
| N(11)-Ni(1)-N(1)  | 86.2(2)  | N(9)-Ni(1)-N(7)   | 94.2(2)  |
| Ni(1)-N(1)-C(1)   | 139.5(5) | N(11)-Ni(1)-N(7)  | 91.7(2)  |
| Ni(1)-N(1)-C(5)   | 108.5(5) | Ni(1)-N(7)-C(9)   | 142.0(5) |
| N(5)-Ni(1)-N(3)   | 90.4(2)  | Ni(1)-N(7)-C(12)  | 113.1(5) |
| N(7)-Ni(1)-N(3)   | 165.2(2) | N(11)-Ni(1)-N(9)  | 78.4(2)  |
| N(9)-Ni(1)-N(3)   | 96.1(2)  | Ni(1)-N(9)-C(13)  | 141.8(5) |
| N(11)-Ni(1)-N(3)  | 100.8(2) | Ni(1)-N(9)-C(17)  | 114.0(5) |
| Ni(1)-N(3)-C(3)   | 141.5(5) | Ni(1)-N(11)-C(15) | 140.8(5) |
| Ni(1)-N(3)-C(6)   | 112.1(5) | Ni(1)-N(11)-C(18) | 111.8(5) |
| N(7)-Ni(1)-N(5)   | 78.9(2)  |                   |          |

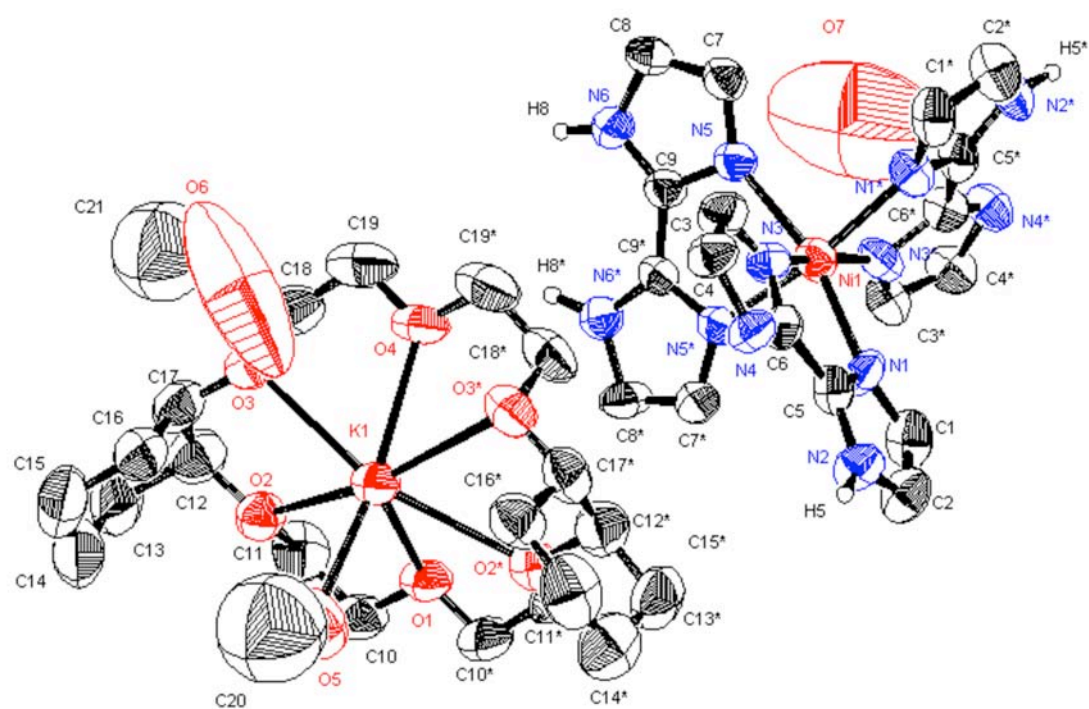

Figure 1S. ORTEP view of crystal 1



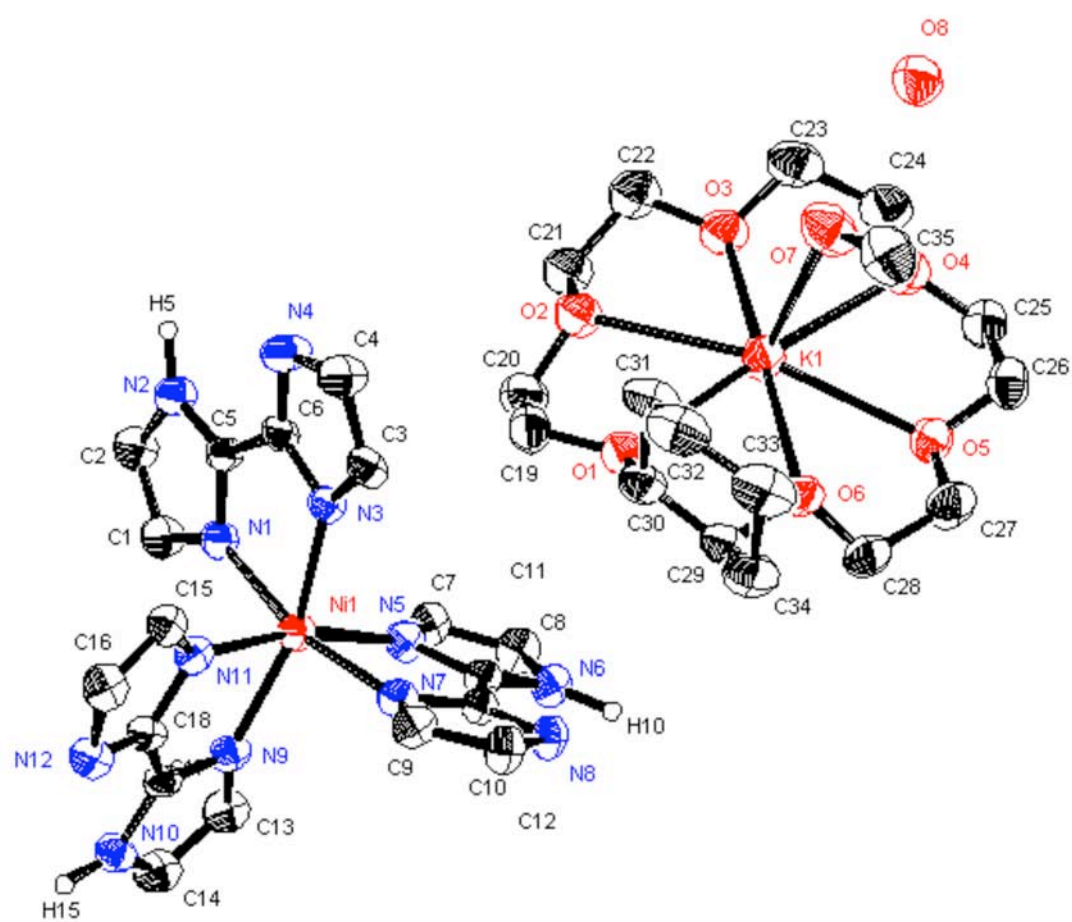

Figure 2S. ORTEP view of crystal 2

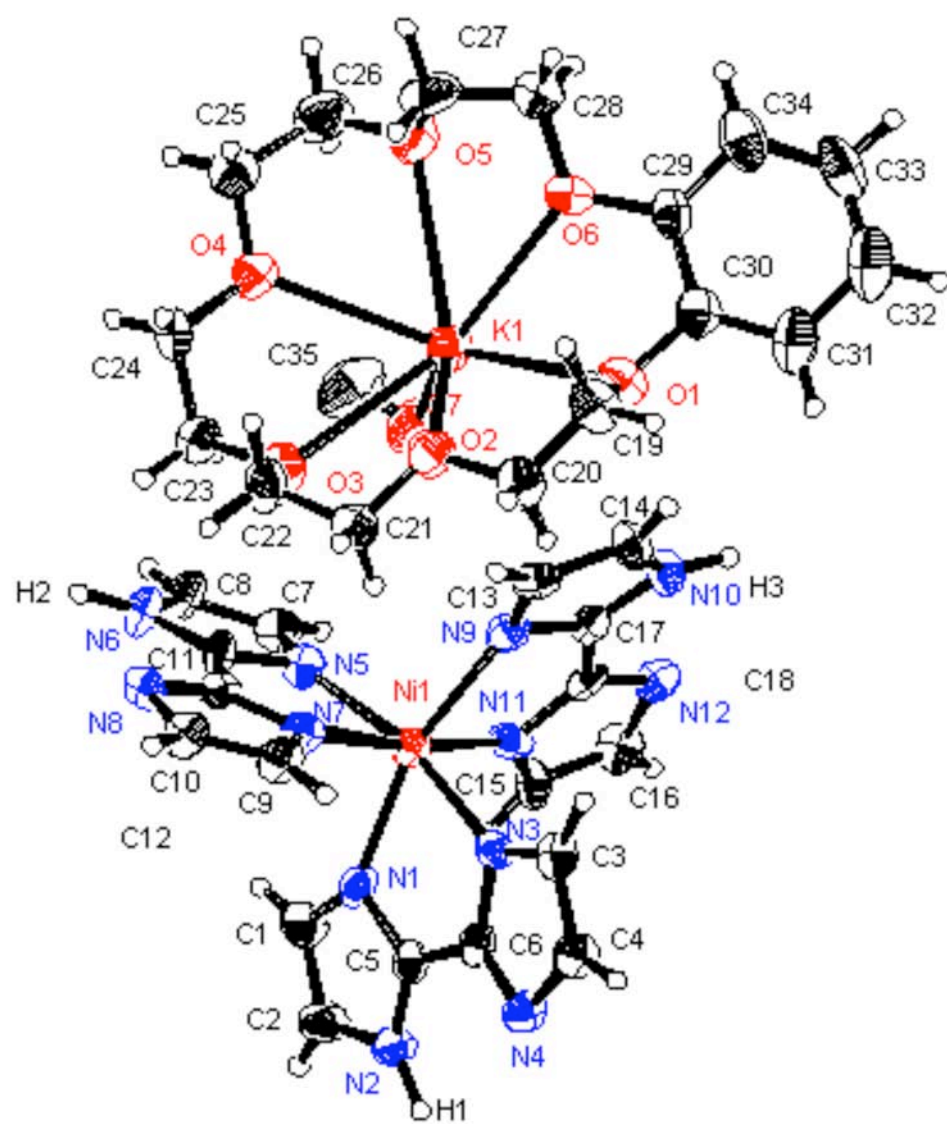

Figure 3S. ORTEP view of crystal 3

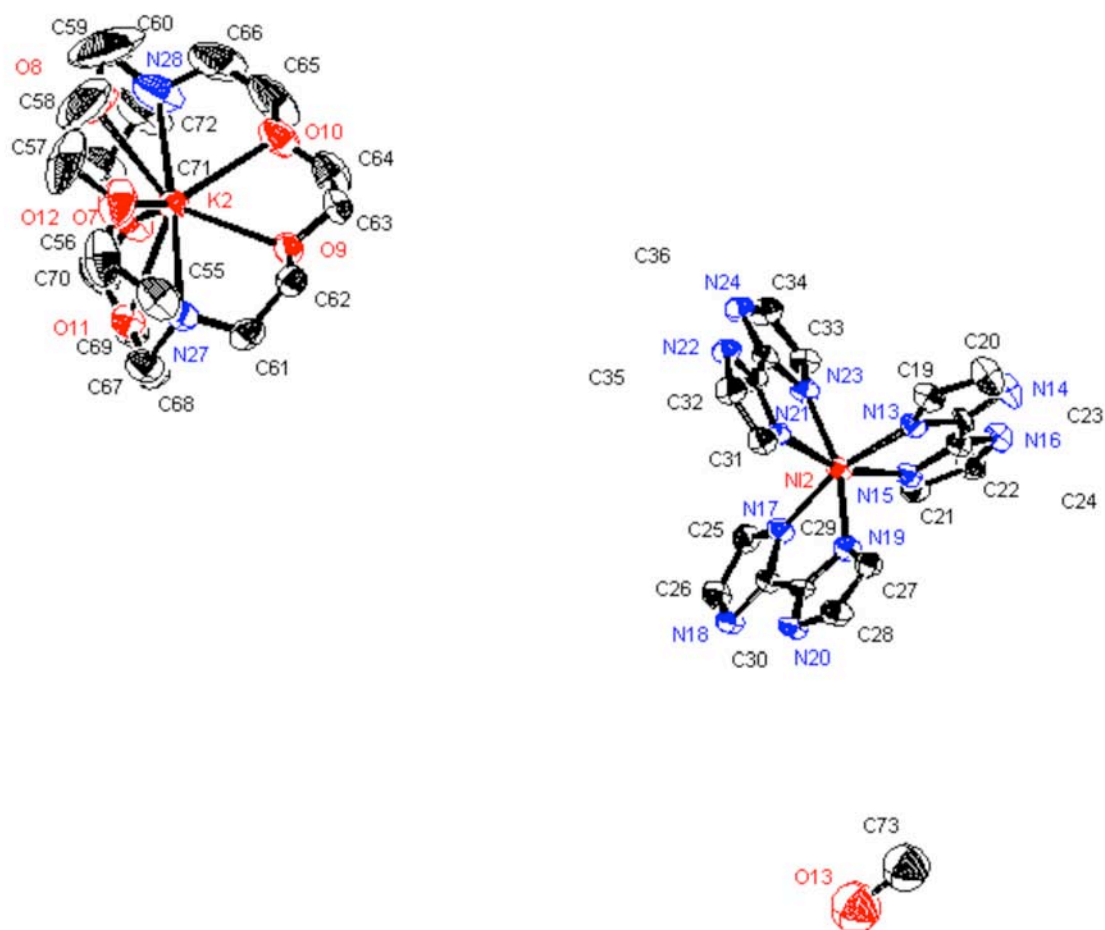

Figure 4S-1. ORTEP view of crystal 4

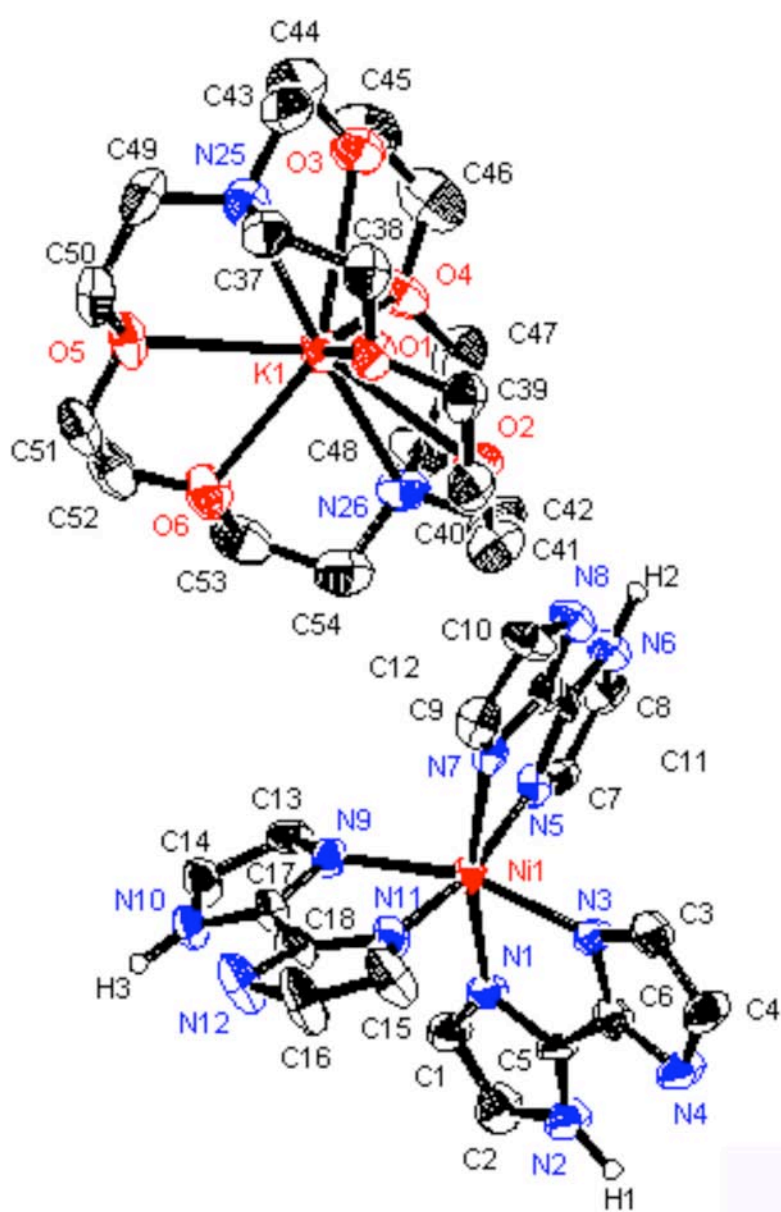

Figure 4S-2. ORTEP view of crystal 4

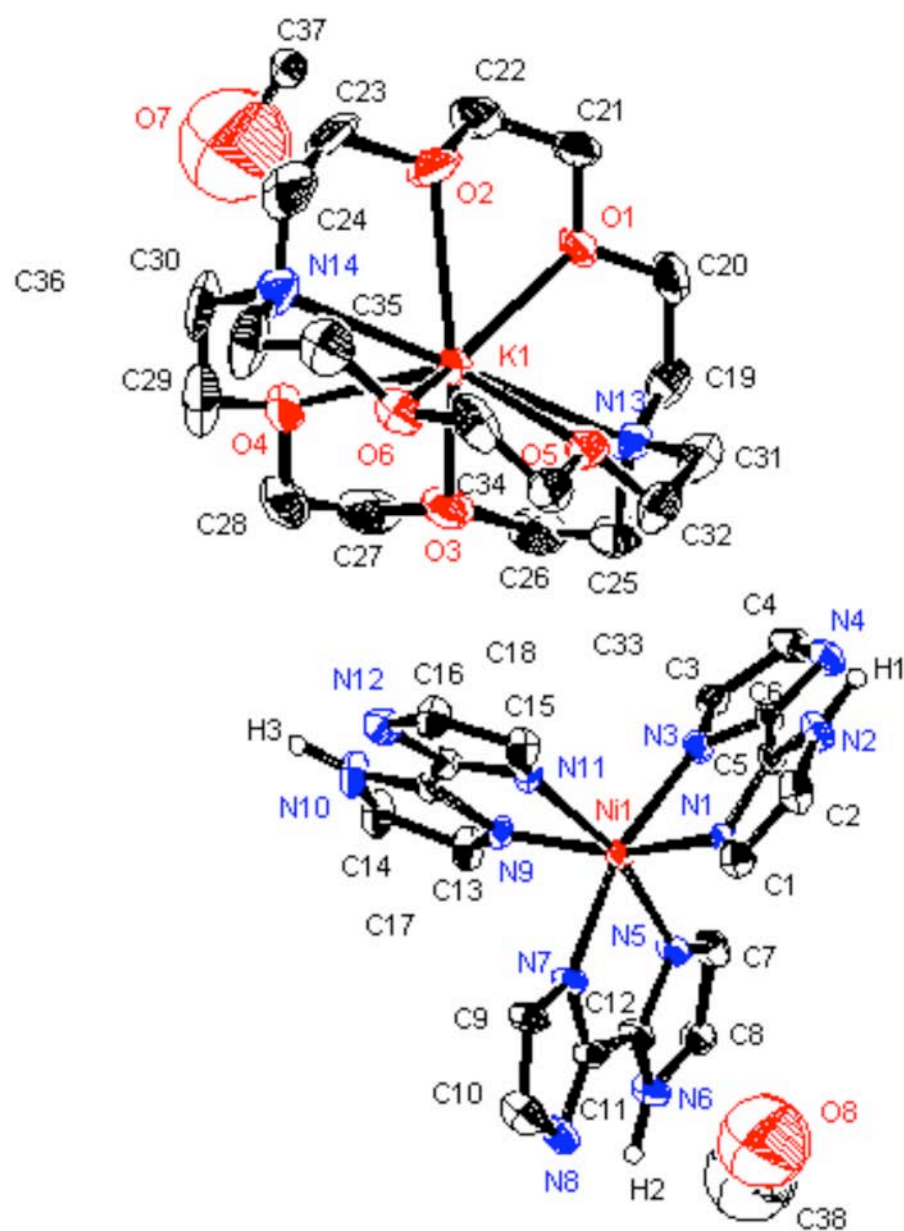

Figure 5S. ORTEP view of crystal 5

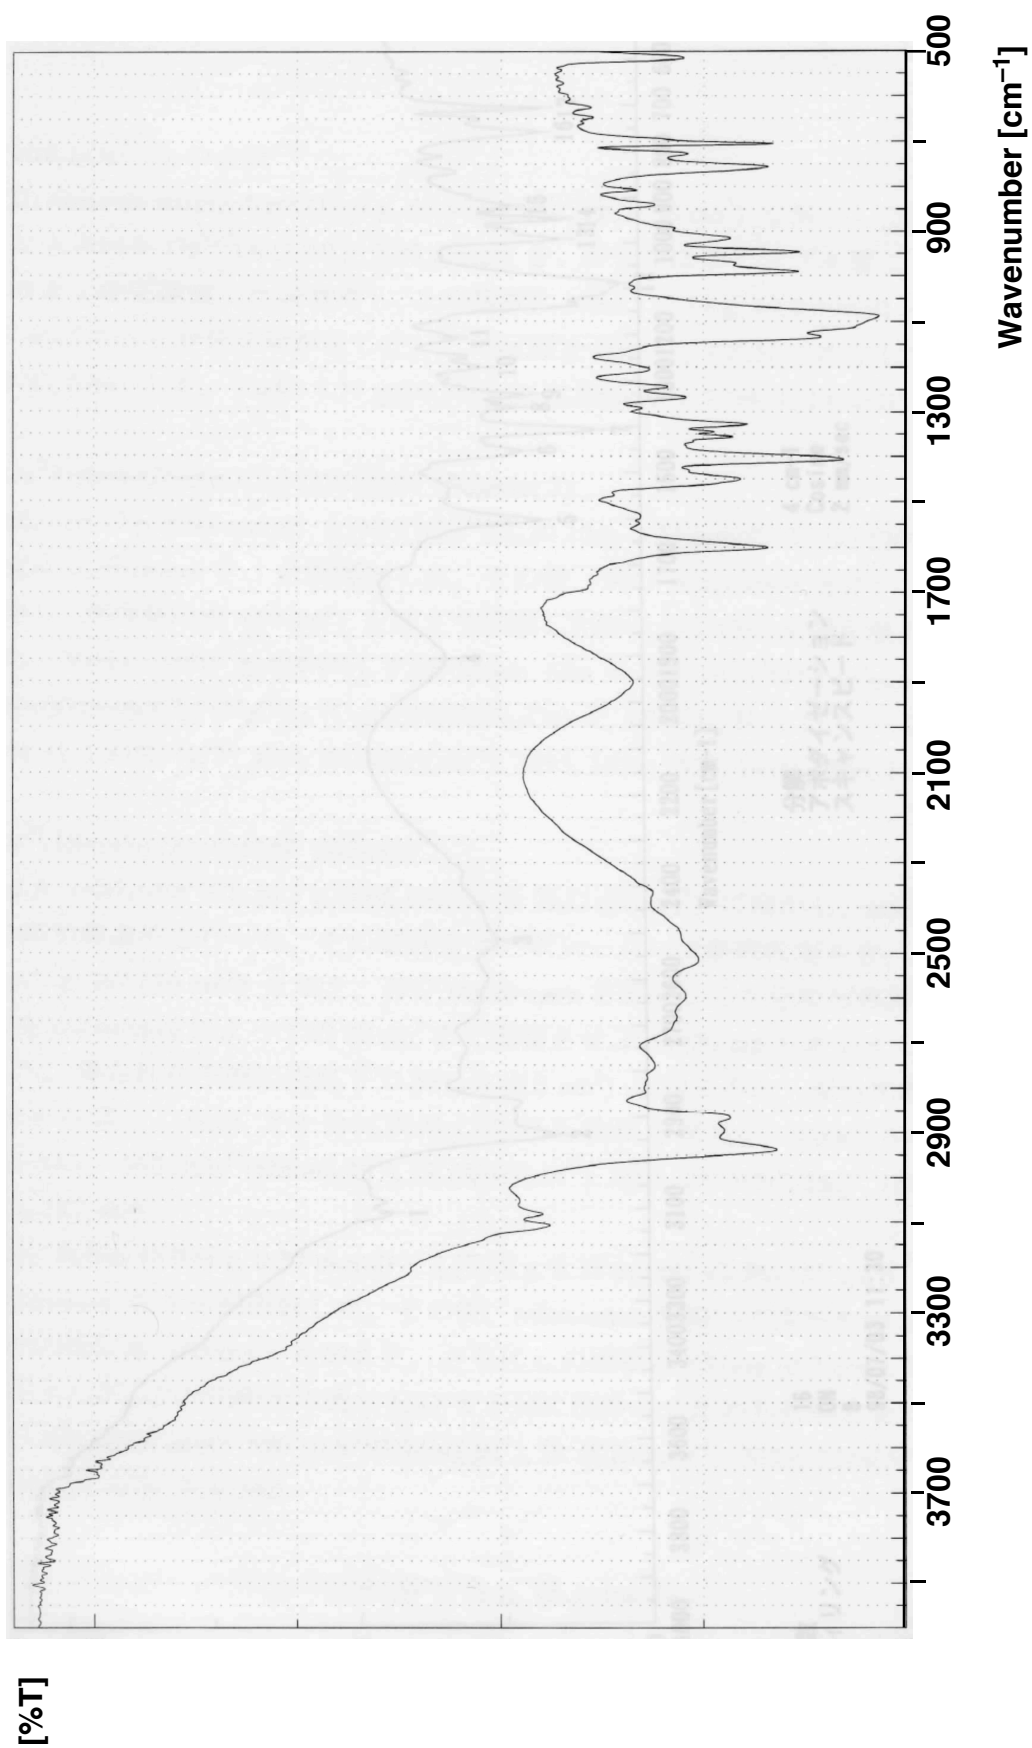

Figure 6S.

IR spectrum of the crystal 1 ( $[\text{Ni}^{\text{II}}(\text{Hbim})_3][\text{K-DHC}(18\text{-crown-}6)]_n$ )
